# Supplementary material for: Linking climate and infectious disease trends in the Northern/Arctic Region
Source: PubMed Central journal article supplement (PMC8526576; doi:10.1038/s41598-021-00167-z), 2021-10-19
Supplement: 41598_2021_167_MOESM1_ESM.pdf [file 41598_2021_167_MOESM1_ESM.pdf]

# Supplementary Materials

Supplementary Figures S1-S5

Supplementary Tables S1-S2

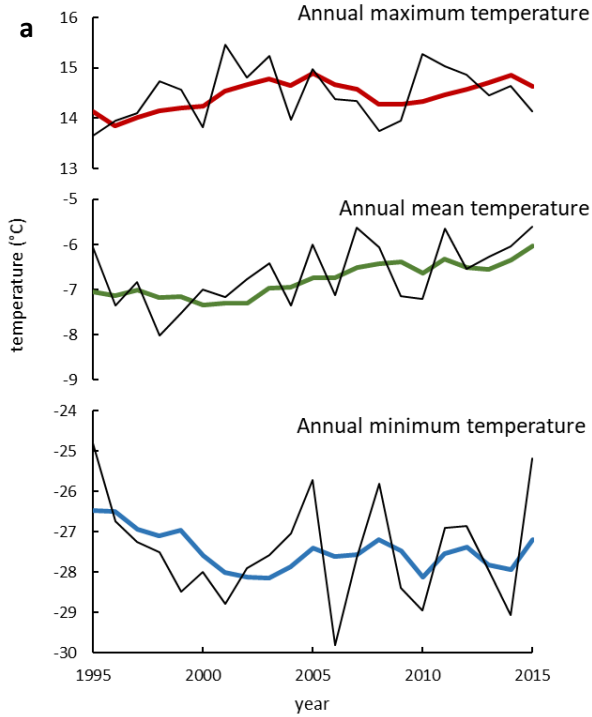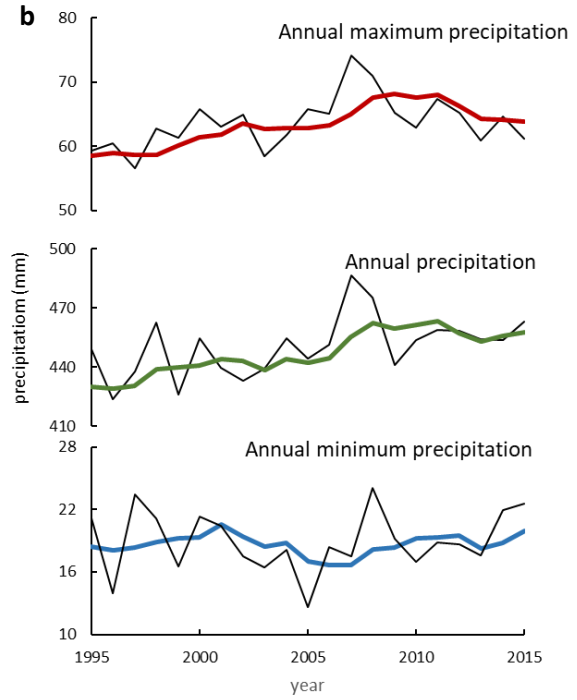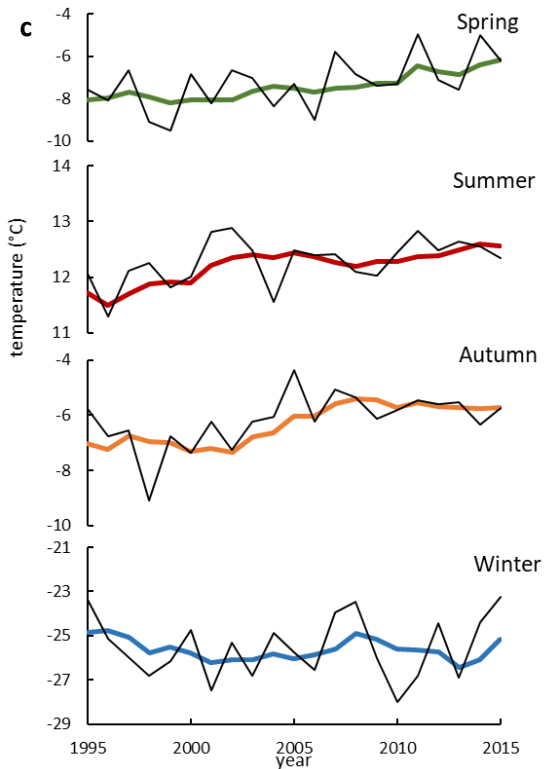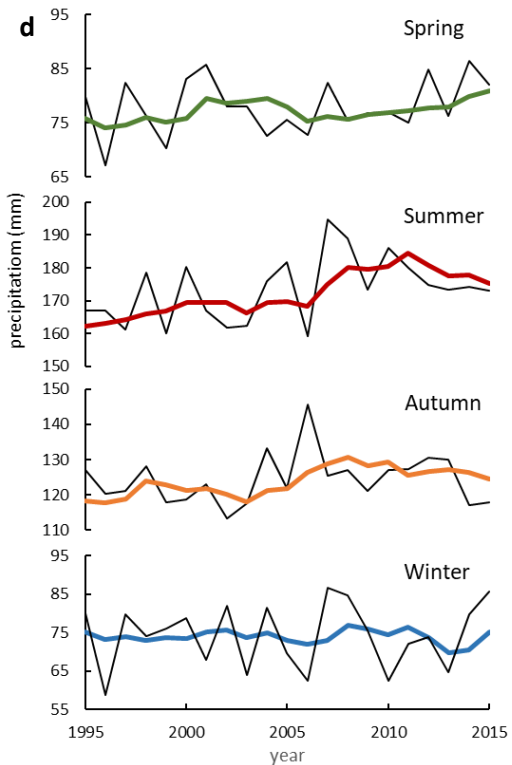

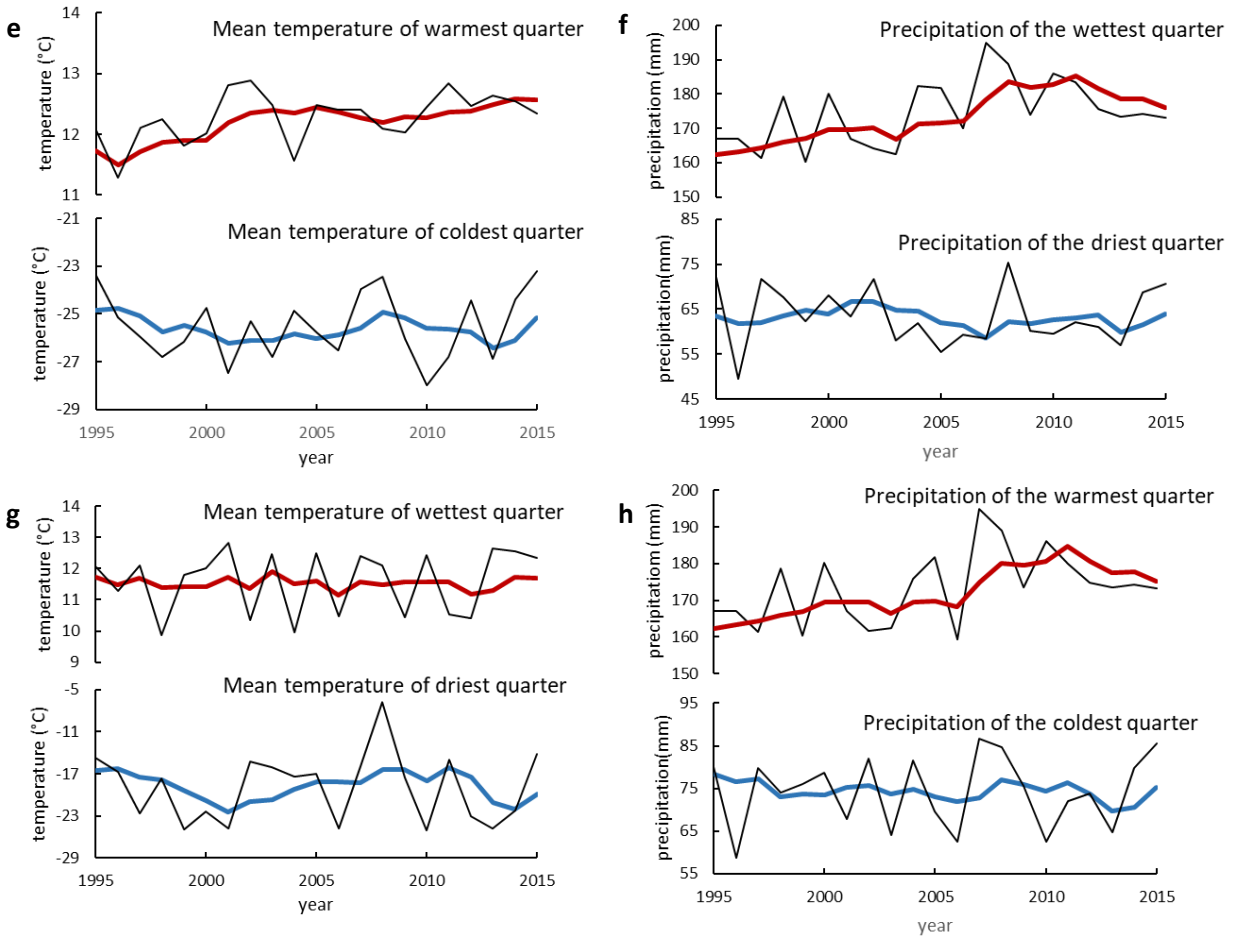

**Supplementary Figure S1. Changes in the 22 selected climate variables in the whole Northern/Arctic Region during the period 1995-2015.** Black lines are annual values and colored lines are values smoothed with a 5-year running mean filter.

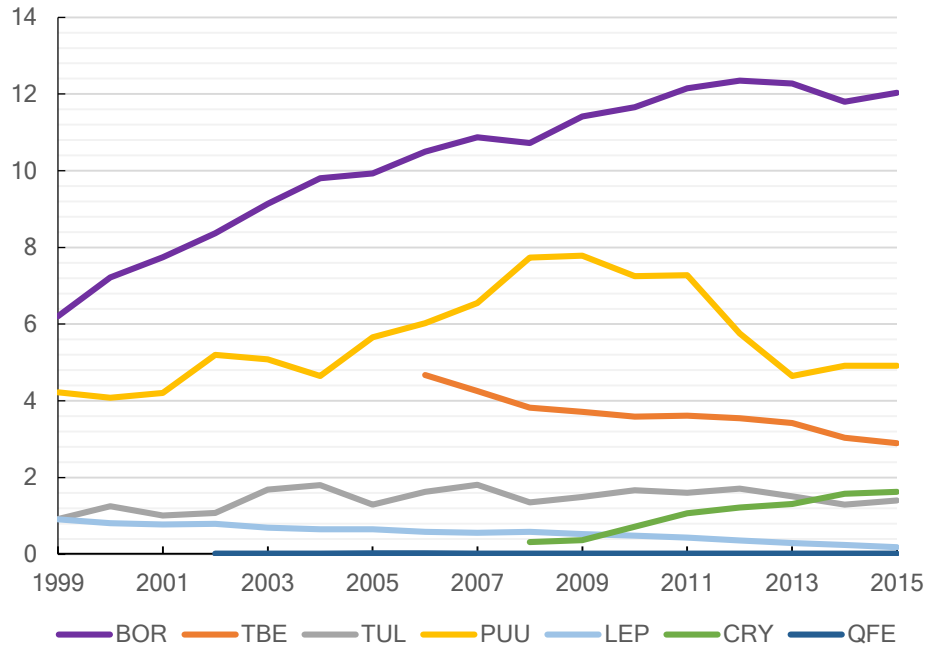

**Supplementary Figure S2. Annual incidence of each zoonotic infectious disease in the whole Northern/Arctic Region, 1999-2015.** All data smoothed with a 5-year running mean filter. BOR = borreliosis, BRU = brucellosis, CRY = cryptosporidiosis, LEP = leptospirosis, PUU = Puumala virus infection, QFE = Q fever, TBE = tick-borne encephalitis, TUL = tularemia.

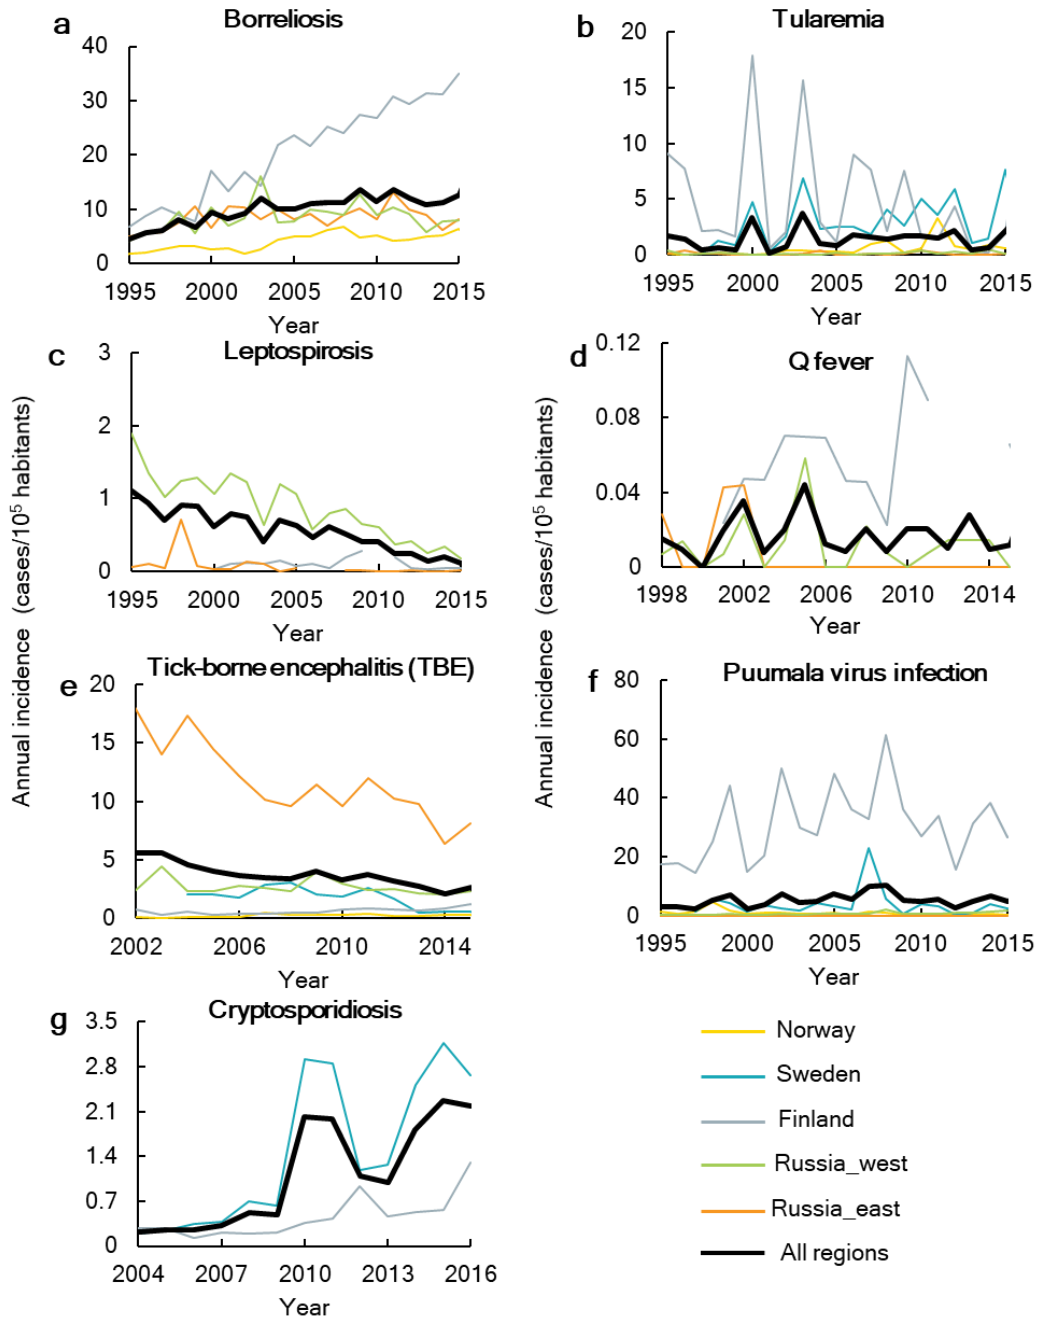

**Supplementary Figure S3: Annual incidence of seven infectious diseases over the whole Northern/Arctic Region and different countries or country parts within it.**

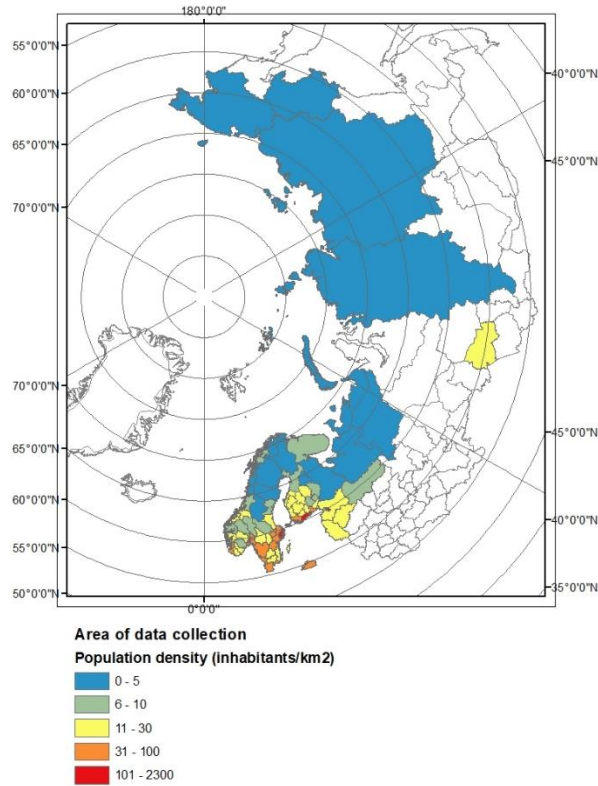

a

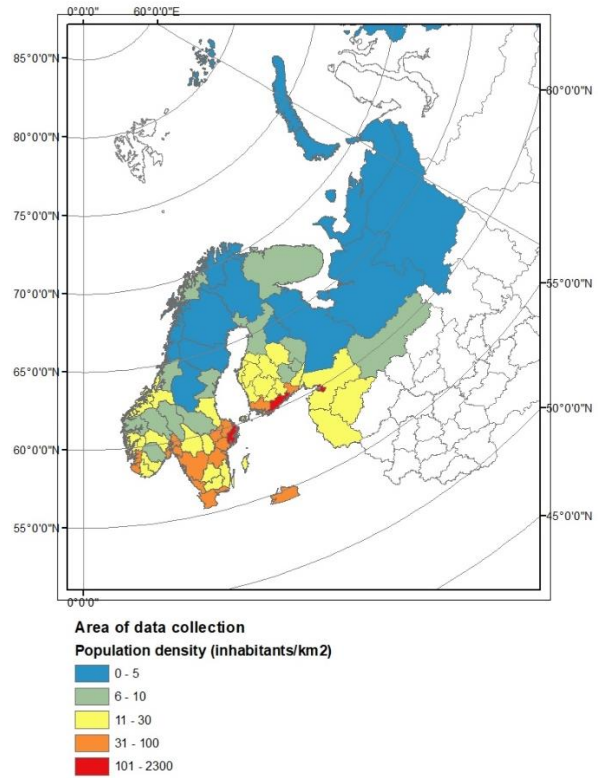

b

**Supplementary Figure S4. Population density based on the average population from 1995 to 2015 in each district of (a) the whole study region, and (b) the European part.** The map was generated using ArcGIS 10.5.1 (<https://www.esri.com/en-us/home>).

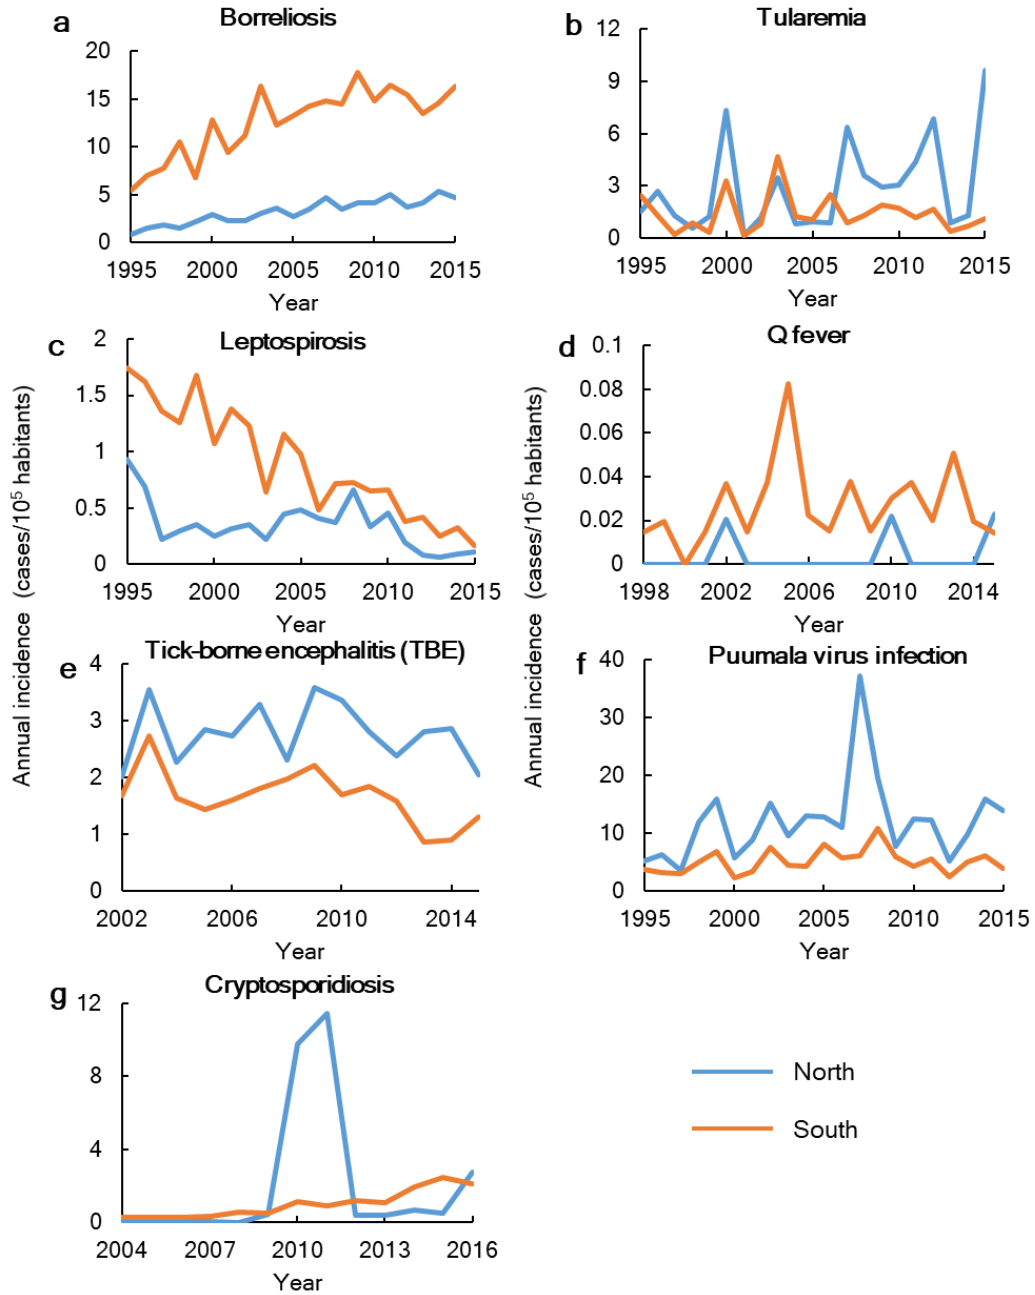

**Supplementary Figure S5. Annual incidence of the seven infectious diseases over northern and southern parts in the European side of the study region. The two parts were divided by latitude 63°N.**

**Supplementary Table S1. Spearman's correlation coefficient  $\rho$  for all zoonotic infectious diseases and climate variables.** BOR = borreliosis, TBE = tick-borne encephalitis, TUL = tularemia, PUU = Puumala virus infection, LEP = leptospirosis, CRY = cryptosporidiosis, QFE = Q fever. \*Significant at  $p < 0.01$ .

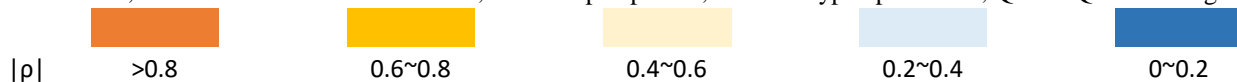

| BOR                   | Temperature (tmp)   |        |        |        |        |         |         |                 |                 |                        |                        |
|-----------------------|---------------------|--------|--------|--------|--------|---------|---------|-----------------|-----------------|------------------------|------------------------|
|                       | Year                | Winter | Spring | Summer | Autumn | Yearmax | Yearmin | Warmest quarter | Coldest quarter | Tmp of wettest quarter | Tmp of driest quarter  |
| Norway_Finland_Russia | 0.85*               | 0.17   | 0.91*  | 0.56   | 0.75*  | 0.17    | 0.24    | 0.56            | 0.17            | -0.04                  | 0.23                   |
| North                 | 0.81*               | 0.51   | 0.9*   | 0.41   | 0.84*  | -0.08   | 0.40    | 0.41            | 0.41            | -0.76*                 | -0.67*                 |
| South                 | 0.60                | -0.08  | 0.8*   | 0.53   | 0.78*  | 0.20    | -0.54   | 0.53            | -0.15           | -0.17                  | -0.82*                 |
|                       | Precipitation (pre) |        |        |        |        |         |         |                 |                 |                        |                        |
|                       | Year                | Winter | Spring | Summer | Autumn | Yearmax | Yearmin | Wettest quarter | Driest quarter  | Pre of warmest quarter | Pre of coldest quarter |
| Norway_Finland_Russia | 0.78*               | -0.07  | 0.22   | 0.77*  | 0.61   | 0.78*   | -0.10   | 0.78*           | -0.51           | 0.77*                  | -0.18                  |
| North                 | 0.64*               | -0.38  | 0.38   | 0.37   | 0.55   | -0.05   | 0.14    | 0.44            | -0.50           | 0.37                   | -0.77*                 |
| South                 | 0.79*               | -0.46  | 0.17   | 0.79*  | 0.88*  | 0.59    | -0.44   | 0.74*           | -0.49           | 0.79*                  | -0.59                  |

| TUL         | Temperature (tmp)   |        |        |        |        |         |         |                 |                 |                        |                        |
|-------------|---------------------|--------|--------|--------|--------|---------|---------|-----------------|-----------------|------------------------|------------------------|
|             | Year                | Winter | Spring | Summer | Autumn | Yearmax | Yearmin | Warmest quarter | Coldest quarter | Tmp of wettest quarter | Tmp of driest quarter  |
| All regions | 0.36                | 0.12   | 0.44   | 0.23   | 0.47   | 0.18    | -0.14   | 0.23            | 0.12            | -0.10                  | 0.42                   |
| North       | 0.48                | 0.22   | 0.78*  | -0.12  | 0.73*  | -0.39   | 0.10    | -0.12           | 0.06            | -0.47                  | -0.72                  |
| South       | 0.33                | 0.08   | 0.13   | 0.45   | 0.19   | 0.50    | -0.21   | 0.45            | 0.00            | 0.05                   | -0.05                  |
|             | Precipitation (pre) |        |        |        |        |         |         |                 |                 |                        |                        |
|             | Year                | Winter | Spring | Summer | Autumn | Yearmax | Yearmin | Wettest quarter | Driest quarter  | Pre of Warmest quarter | Pre of coldest quarter |
| All regions | 0.33                | -0.18  | -0.01  | 0.21   | 0.30   | 0.46    | -0.30   | 0.35            | -0.38           | 0.21                   | -0.18                  |
| North       | 0.36                | -0.51  | 0.54   | 0.35   | 0.26   | -0.54   | 0.56    | -0.19           | -0.01           | 0.35                   | -0.64                  |
| South       | -0.23               | -0.23  | -0.18  | 0.04   | -0.08  | 0.18    | -0.49   | -0.05           | -0.51           | 0.04                   | -0.27                  |

| LEP | Temperature (tmp) |  |  |  |  |  |  |  |  |  |  |
|-----|-------------------|--|--|--|--|--|--|--|--|--|--|
|     |                   |  |  |  |  |  |  |  |  |  |  |

|                     | Year   | Winter | Spring | Summer | Autumn | Yearmax | Yearmin | Warmest quarter | Coldest quarter | Tmp of wettest quarter | Tmp of driest quarter  |
|---------------------|--------|--------|--------|--------|--------|---------|---------|-----------------|-----------------|------------------------|------------------------|
| Finland_Russia      | -0.88* | -0.23  | -0.95* | -0.59  | -0.7*  | -0.15   | -0.29   | -0.59           | -0.23           | -0.78*                 | -0.02                  |
| North               | 0.13   | 0.47   | -0.30  | -0.34  | 0.04   | -0.15   | 0.42    | -0.34           | 0.49            | 0.13                   | -0.02                  |
| South               | -0.78* | -0.04  | -0.81* | -0.47  | -0.81* | -0.11   | 0.48    | -0.47           | 0.06            | -0.63*                 | 0.44                   |
| Precipitation (pre) |        |        |        |        |        |         |         |                 |                 |                        |                        |
|                     | Year   | Winter | Spring | Summer | Autumn | Yearmax | Yearmin | Wettest quarter | Driest quarter  | Pre of Warmest quarter | Pre of coldest quarter |
| Finland_Russia      | -0.75* | -0.18  | -0.39  | -0.72* | -0.63* | -0.71*  | -0.01   | -0.71*          | 0.24            | -0.72*                 | -0.02                  |
| North               | 0.40   | 0.42   | 0.19   | 0.01   | 0.36   | 0.77*   | -0.28   | 0.47            | 0.01            | 0.01                   | -0.01                  |
| South               | -0.79* | 0.50   | -0.27  | -0.57  | -0.84* | -0.34   | 0.04    | -0.13           | 0.53            | -0.57                  | 0.58                   |

| QFE                 | Temperature (tmp) |        |        |        |        |         |         |                 |                 |                        |                        |
|---------------------|-------------------|--------|--------|--------|--------|---------|---------|-----------------|-----------------|------------------------|------------------------|
|                     | Year              | Winter | Spring | Summer | Autumn | Yearmax | Yearmin | Warmest quarter | Coldest quarter | Tmp of wettest quarter | Tmp of driest quarter  |
| Finland_Russia      | 0.01              | 0.05   | -0.30  | -0.16  | 0.13   | 0.07    | 0.24    | -0.16           | 0.05            | -0.41                  | 0.54                   |
| North               | 0.03              | -0.18  | 0.78*  | -0.15  | 0.24   | -0.48   | -0.42   | -0.15           | -0.32           | -0.20                  | -0.32                  |
| South               | 0.40              | 0.02   | -0.37  | -0.27  | 0.55   | -0.42   | 0.18    | -0.27           | -0.09           | 0.23                   | -0.27                  |
| Precipitation (pre) |                   |        |        |        |        |         |         |                 |                 |                        |                        |
|                     | Year              | Winter | Spring | Summer | Autumn | Yearmax | Yearmin | Wettest quarter | Driest quarter  | Pre of Warmest quarter | Pre of coldest quarter |
| Finland_Russia      | -0.14             | -0.45  | -0.27  | -0.06  | 0.22   | -0.02   | -0.71*  | -0.05           | -0.24           | -0.06                  | -0.45                  |
| North               | 0.15              | -0.7*  | -0.61  | 0.71*  | -0.04  | -0.52   | 0.56    | 0.22            | -0.03           | 0.71*                  | -0.50                  |
| South               | 0.12              | -0.45  | 0.64   | 0.14   | 0.09   | 0.13    | -0.78*  | 0.27            | -0.61           | 0.14                   | -0.66                  |

| TBE                 | Temperature (tmp) |        |        |        |        |         |         |                 |                 |                        |                       |
|---------------------|-------------------|--------|--------|--------|--------|---------|---------|-----------------|-----------------|------------------------|-----------------------|
|                     | Year              | Winter | Spring | Summer | Autumn | Yearmax | Yearmin | Warmest quarter | Coldest quarter | Tmp of wettest quarter | Tmp of driest quarter |
| All regions         | -0.43             | 0.30   | -0.89* | -0.81* | 0.33   | -0.39   | -0.01   | -0.81*          | 0.30            | -0.52                  | 0.49                  |
| North               | -0.48             | -0.09  | -0.02  | -0.42  | -0.02  | -0.14   | -0.25   | -0.42           | -0.27           | 0.44                   | -0.38                 |
| South               | -0.30             | 0.01   | 0.09   | -0.18  | -0.56  | 0.02    | -0.09   | -0.18           | 0.05            | 0.28                   | 0.14                  |
| Precipitation (pre) |                   |        |        |        |        |         |         |                 |                 |                        |                       |



|             | Year  | Winter | Spring | Summer | Autumn | Yearmax | Yearmin | Wettest quarter | Driest quarter | Pre of Warmest quarter | Pre of coldest quarter |
|-------------|-------|--------|--------|--------|--------|---------|---------|-----------------|----------------|------------------------|------------------------|
| All regions | -0.05 | 0.21   | -0.98* | -0.19  | 0.39   | 0.20    | -0.76   | 0.04            | -0.45          | -0.19                  | 0.21                   |
| North       | 0.26  | -0.05  | 0.15   | 0.54   | -0.02  | -0.01   | 0.01    | 0.32            | 0.07           | 0.54                   | -0.41                  |
| South       | 0.26  | 0.05   | -0.19  | 0.54   | -0.14  | 0.73    | -0.19   | 0.68            | 0.12           | 0.54                   | 0.20                   |

| PUU         | Temperature (tmp)   |        |        |        |        |         |         |                 |                 |                        |                        |
|-------------|---------------------|--------|--------|--------|--------|---------|---------|-----------------|-----------------|------------------------|------------------------|
|             | Year                | Winter | Spring | Summer | Autumn | Yearmax | Yearmin | Warmest quarter | Coldest quarter | Tmp of wettest quarter | Tmp of driest quarter  |
| All regions | 0.60                | 0.53   | 0.35   | 0.04   | 0.76*  | -0.12   | 0.19    | 0.04            | 0.53            | -0.04                  | 0.82*                  |
| North       | 0.69*               | 0.75*  | 0.23   | 0.29   | 0.46   | 0.24    | 0.67*   | 0.29            | 0.74*           | -0.35                  | -0.04                  |
| South       | 0.63*               | 0.36   | 0.30   | 0.27   | 0.56   | 0.07    | -0.08   | 0.27            | 0.32            | 0.14                   | -0.31                  |
|             | Precipitation (pre) |        |        |        |        |         |         |                 |                 |                        |                        |
|             | Year                | Winter | Spring | Summer | Autumn | Yearmax | Yearmin | Wettest quarter | Driest quarter  | Pre of Warmest quarter | Pre of coldest quarter |
| All regions | 0.7*                | 0.35   | -0.35  | 0.61*  | 0.63*  | 0.82*   | -0.37   | 0.75*           | -0.49           | 0.61*                  | 0.35                   |
| North       | 0.72*               | 0.40   | -0.02  | -0.30  | 0.67*  | 0.40    | -0.37   | 0.74*           | -0.64*          | -0.30                  | -0.26                  |
| South       | 0.42                | 0.00   | 0.03   | 0.50   | 0.29   | 0.58    | -0.46   | 0.50            | -0.50           | 0.50                   | -0.18                  |

| CRY            | Temperature (tmp)   |        |        |        |        |         |         |                 |                 |                        |                        |
|----------------|---------------------|--------|--------|--------|--------|---------|---------|-----------------|-----------------|------------------------|------------------------|
|                | Year                | Winter | Spring | Summer | Autumn | Yearmax | Yearmin | Warmest quarter | Coldest quarter | Tmp of wettest quarter | Tmp of driest quarter  |
| Sweden_Finland | 0.18                | -0.45  | 0.85*  | 0.10   | 0.28   | 0.70    | -0.48   | 0.10            | -0.32           | 0.85*                  | 0.20                   |
| North          | -0.60               | -0.95* | 0.35   | 0.22   | -0.13  | 0.50    | -0.82*  | 0.22            | -0.9*           | 0.62                   | -0.9*                  |
| South          | -0.13               | -0.45  | 0.65   | -0.35  | 0.13   | 0.05    | -0.38   | -0.35           | -0.32           | 0.85*                  | 0.13                   |
|                | Precipitation (pre) |        |        |        |        |         |         |                 |                 |                        |                        |
|                | Year                | Winter | Spring | Summer | Autumn | Yearmax | Yearmin | Wettest quarter | Driest quarter  | Pre of Warmest quarter | Pre of coldest quarter |
| Sweden_Finland | -0.38               | -0.07  | 0.30   | -0.27  | -0.70  | -0.97*  | 0.63    | -0.73           | 0.78            | -0.27                  | 0.45                   |
| North          | -0.15               | -0.97* | 0.75   | 0.45   | -0.38  | -0.10   | 0.43    | -0.37           | 0.52            | 0.45                   | -0.42                  |
| South          | 0.00                | 0.32   | 0.15   | -0.27  | -0.50  | -0.93*  | -0.13   | -0.72           | 0.63            | -0.27                  | 0.65                   |

**Supplementary Table S2. Results of stepwise regression of significant variables**

| <b>Diseases</b>         | <b>Regions</b>        | <b>Significant variables *</b>         | <b>Added/removed</b> | <b>R<sup>2</sup></b> | <b>Adjusted-R<sup>2</sup></b> |
|-------------------------|-----------------------|----------------------------------------|----------------------|----------------------|-------------------------------|
| Borreliosis             | Norway+Finland+Russia | Autumn temperature                     | addition             | 0.796                | 0.782                         |
|                         |                       | Spring temperature                     | addition             | 0.896                | 0.881                         |
|                         | North                 | Autumn temperature                     | addition             | 0.847                | 0.836                         |
|                         |                       | Spring temperature                     | addition             | 0.938                | 0.930                         |
|                         | South                 | Autumn temperature                     | addition             | 0.798                | 0.785                         |
|                         |                       | Spring temperature                     | addition             | 0.923                | 0.912                         |
| Tick-borne encephalitis | The whole region      | Spring precipitation                   | addition             | 0.793                | 0.767                         |
|                         | North                 | N/A                                    |                      |                      |                               |
|                         | South                 | N/A                                    |                      |                      |                               |
| Tularemia               | The whole region      | N/A                                    |                      |                      |                               |
|                         | North                 | Spring temperature                     | addition             | 0.621                | 0.596                         |
|                         | South                 | N/A                                    |                      |                      |                               |
| Q fever                 | Finland+Russia        | Annual minimum monthly precipitation** |                      | 0.495                |                               |
|                         | North                 | Winter precipitation                   | addition             | 0.193                | 0.126                         |
|                         | South                 | Annual minimum monthly precipitation** |                      | 0.480                |                               |
| Puumala virus infection | The whole region      | Annual maximum monthly precipitation   | addition             | 0.801                | 0.787                         |
|                         |                       | Mean temperature of the driest quarter | addition             | 0.896                | 0.881                         |
|                         |                       | Summer precipitation                   | addition             | 0.941                | 0.928                         |
|                         | North                 | Annual precipitation                   | addition             | 0.662                | 0.640                         |
|                         |                       | Precipitation of the driest quarter    | addition             | 0.808                | 0.781                         |
|                         | South                 | Annual mean temperature**              |                      | 0.402                |                               |
| Leptospirosis           | Finland+Russia        | Spring temperature                     | addition             | 0.903                | 0.897                         |
|                         | North                 | Annual maximum monthly precipitation** |                      | 0.413                |                               |
|                         | South                 | Autumn temperature                     | addition             | 0.814                | 0.801                         |
| Spring temperature      |                       | addition                               | 0.913                | 0.901                |                               |

|                   |                |                                         |          |       |       |
|-------------------|----------------|-----------------------------------------|----------|-------|-------|
| Cryptosporidiosis | Sweden+Finland | Mean temperature of the wettest quarter | addition | 0.871 | 0.853 |
|                   | North          | Mean temperature of the coldest quarter | addition | 0.913 | 0.900 |
|                   | South          | Annual maximum monthly precipitation    | addition | 0.875 | 0.857 |

\*Significance for all variables  $p < 0.01$ .

\*\*The only correlated variable with the significance  $p < 0.01$  in Spearman correlation analysis.
